# Supplementary material
Source: publisher figshare collection journal article supplement (https://acs.figshare.com/ndownloader/files/4515424)
Supplement: Supplementary file 1 [file 4515424]

# **Local-Field-Induced Effective Magnetic Hysteresis of Molecular Magneto-Optical Effects in the Visible Region at Room Temperature: Phthalocyanine Thin Films on Ferromagnetic Inorganic Substrates**

*Kazuyuki Ishii\* and Kazutaka Ozawa*

*Contribution from the Institute of Industrial Science, The University of Tokyo, 4-6-1 Komaba,  
Meguro-ku, Tokyo 153-8505, Japan.*

## Supporting Information:

**Bis(tri-*n*-hexylsiloxy){2,9(or10),16(or17),23(or24)-tetra-*tert*-butylphthalocyanato}silicon,**

**SiPc(OTHS)<sub>2</sub>**<sup>12</sup>

Anal. Calcd for C<sub>84</sub>N<sub>8</sub>H<sub>126</sub>O<sub>2</sub>Si<sub>3</sub>: C, 73.95; H, 9.31; N, 8.21. Found: C, 73.79; H, 8.76; N, 7.39.

MALDI-TOF-mass  $m/z = 1362.3$  (M<sup>+</sup>), UV-vis (Toluene)  $\lambda/\text{nm}$  ( $\epsilon/10^4$ ) 676 (33), 646 (3.9), 609(4.5), 356(9.4).

## Cast films

For preparing thin films, 10  $\mu\text{L}$  of ethanol solution containing 0.19 mM of SiPc(OTHS)<sub>2</sub> were dripped down onto an area determined by masking tapes ((10  $\times$  15) and (5  $\times$  15) mm<sup>2</sup> for Ni and SrO·6Fe<sub>2</sub>O<sub>3</sub> substrates, respectively). Although cast films prepared by using CHCl<sub>3</sub> or toluene were obviously inhomogeneous, the relatively homogeneous cast films were easily prepared by using EtOH as a solvent, which covered the most parts of the substrates. The thicknesses of the cast films (~20 and ~32 nm for Ni and SrO·6Fe<sub>2</sub>O<sub>3</sub> substrates, respectively) were evaluated from the molecular space of SiPc(OTHS)<sub>2</sub> (1.6  $\times$  1.6  $\times$  1.45 nm<sup>3</sup>/mole evaluated from the optimized structure calculated using the PM3 Hamiltonian, Fig. 1) and the number of moles of SiPc(OTHS)<sub>2</sub>, which was evaluated by extracting SiPc with toluene and measuring the absorbance at the Q band. This evaluation method was supported by a fact that the molecular space calculated was consistent with the nitrogen adsorption-desorption measurements.<sup>13</sup> The AFM measurements indicate that it was unfortunately difficult to determine the small thickness (a few tens of nanometres), since the roughness of the substrates was a few hundreds of nanometres.

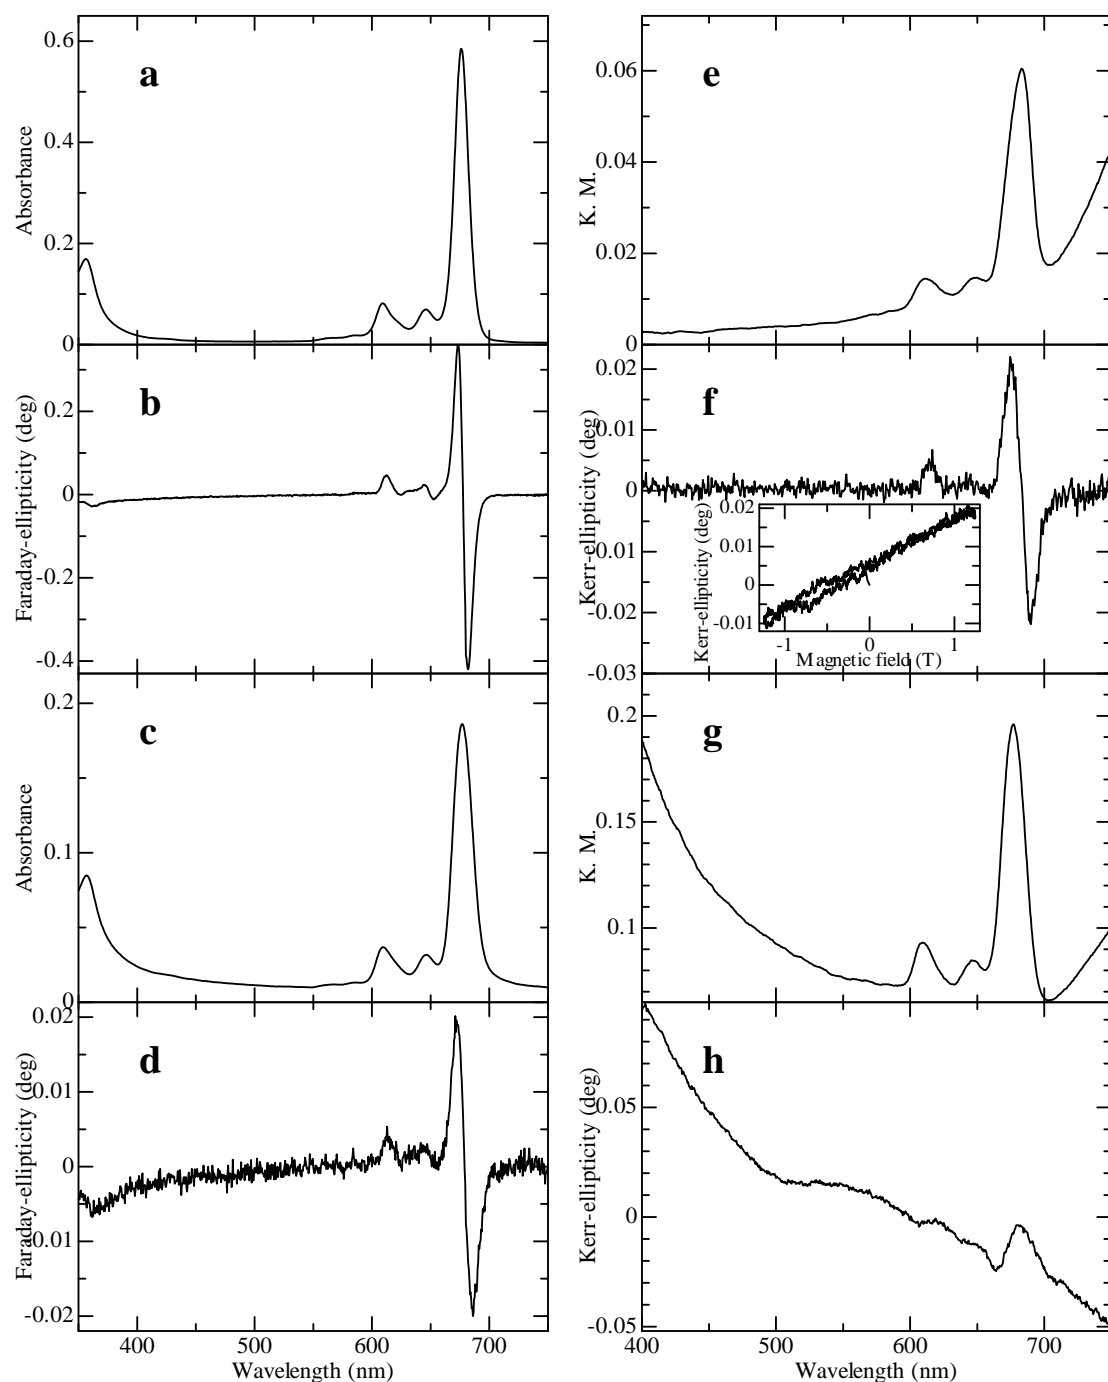

**Fig. S1** Diffuse transmission (a, c), diffuse reflection (e, g), Faraday-ellipticity (b, d), and Kerr-ellipticity (f, h) spectra of SiPc(OTHS)<sub>2</sub>. These spectra were measured in toluene solution (a, b), as a film on a glass substrate (c, d), as a film on an Al substrate (e, f), and as a film on a Ni substrate (g, h), respectively. The spectroscopic properties of thin films, such as the sharp Q absorption band and intense magneto-optical signal, are similar to those of toluene solution. Inset (f) shows the magnetic field dependence of Kerr-ellipticity (675 nm) in the case of SiPc(OTHS)<sub>2</sub> on the Al substrate. Because of the diamagnetic Al substrate, the magneto-optical signal increases in proportion to the external magnetic field strength.

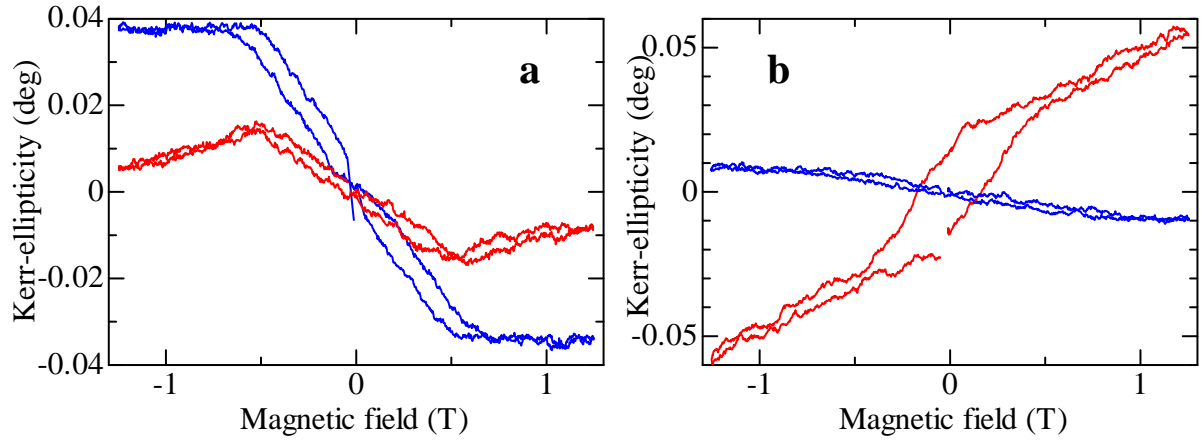

**Fig. S2** Magnetic field dependences of Kerr-ellipticity (680 nm) for SiPc(OTHS)<sub>2</sub> films (red line) on Ni (a) and SrO·6Fe<sub>2</sub>O<sub>3</sub> (b) substrates. The blue lines show magnetic field dependences of Kerr-ellipticity (680 nm) for the Ni (a) and SrO·6Fe<sub>2</sub>O<sub>3</sub> (b) substrates. In the case of SiPc(OTHS)<sub>2</sub> on SrO·6Fe<sub>2</sub>O<sub>3</sub>, the magnetic hysteresis (680 nm) of Kerr-ellipticity is clearly attributed to SiPc(OTHS)<sub>2</sub> interacting with SrO·6Fe<sub>2</sub>O<sub>3</sub> (Fig. 3f), since the magneto-optical signal due to SrO·6Fe<sub>2</sub>O<sub>3</sub> is negligibly small compared with that due to SiPc(OTHS)<sub>2</sub>. In the case of Ni, the deduction is also meaningful, since the slope change by adding SiPc(OTHS)<sub>2</sub> is obviously larger at the low magnetic field region than that at the high magnetic field region.
